# Supplementary material
Source: publisher site journal article supplement (https://www.dovepress.com/get_supplementary_file.php?f=387726.docx)
Supplement: Supplementary file 1 [file get_supplementary_file.php]

Supplementary Table 1. Relationship between UHR and diabetes complications

|  | UHR | | | | P for trend | 1‐SD increment |
| --- | --- | --- | --- | --- | --- | --- |
| Quartile1 | Quartile2 | Quartile3 | Quartile4 | Of UHR |
| CVD | ref | 1.18(0.96,1.45) | 1.22(0.99,1.51) | 1.28(1.02,1.61) | <0.001 | 1.26(1.03,1.15) |
| CKD | ref | 1.12(0.89,1.42) | 1.41(1.12,1.77) | 1.78(1.39,2.27) | <0.001 | 1.28(1.20,1.39) |
| DR | ref | 0.98 (0.69,1.42) | 1.00(0.70,1.43) | 1.04(0.72,1.50) | 0.384 | 0.92 (0.79, 1.08) |

Data are expressed as regression coefficients or odds ratios (95% CI). The Model was adjusted for model age, sex, BMI, smoke status, drink status, TC, LDL, HbA1c, eGFR (only in CVD and DR group), systolic blood pressure, diastolic blood pressure, anti-diabetes agents, hypertension, antihypertension drug

Supplementary Table 2. Relationship between UA and diabetes complications

|  | UA ,μmol/l | | | | P for trend | 1‐SD increment  Of UA |
| --- | --- | --- | --- | --- | --- | --- |
| Quartile1  ≤1.02 | Quartile2  1.02-1.19 | Quartile3  1.20-1.40 | Quartile4  ≥1.41 |
| CVD | ref | 0.86(0.7,1.04) | 0.94(0.77,1.15) | 1.18(0.97,1.44) | 0.083 | 1.08(0.71,1.16) |
| CKD | ref | 0.83(0.68,1.03) | 1.14(0.93,1.40) | 1.61(1.32,1.96) | <0.001 | 1.25(1.16,1.34) |
| DR | ref | 0.86(0.7,1.04) | 0.94(0.77,1.15) | 1.18(0.97,1.44) | 0.109 | 0.91(0.83,1.11) |

Data are expressed as regression coefficients or odds ratios (95% CI). The Model was adjusted for model age, sex, BMI, smoke status, drink status, TC, LDL, HbA1c, eGFR (only in CVD and DR group), systolic blood pressure, diastolic blood pressure, anti-diabetes agents, hypertension, antihypertension drug

Supplementary Table 3. Relationship between HDL-c and diabetes complications

|  | HDL-c, mmol/l | | | | P for trend | 1‐SD increment  Of HDL-c |
| --- | --- | --- | --- | --- | --- | --- |
| Quartile1  ≤269 | Quartile2  270-317 | Quartile3  318-375 | Quartile4  ≥376 |
| CVD | ref | 0.99(0.83,1.21) | 0.93(0.77,1.13) | 0.83(0.67.1.02) | 0.083 | 0.95(0.88,1.01) |
| CKD | ref | 0.86(0.71,1.04) | 0.82(0.67,0.88) | 0.68(0.55,0.85) | 0.011 | 0.85(0.78,0.93) |
| DR | ref | 1.13(0.88,1.47) | 1.04(0.8,1.36) | 1.21(0.91,1.60) | 0.106 | 1.03(0.93,1.14) |

Data are expressed as regression coefficients or odds ratios (95% CI). The Model was adjusted for model age, sex, BMI, smoke status, drink status, TC, LDL, HbA1c, eGFR (only in CVD and DR group), systolic blood pressure, diastolic blood pressure, anti-diabetes agents, hypertension, antihypertension drug
